# Supplementary material for: The Assessment of Activity of Antiseptic Agents against Biofilm of Staphylococcus aureus Measured with the Use of Processed Microscopic Images
Source: MDPI journal article supplement (doi:10.3390/ijms232113524), 2022-11-04

**Table S1. Confluence [%] of analyzed staphylococcal biofilms (number of strains = 10)**

| strain description | confluence [%] | average confluence [%] for<br>n=10 strains |
|--------------------|----------------|--------------------------------------------|
| ATCC 6538          | 99,9           | 93,61±5,55                                 |
| ATCC 33591         | 99,9           |                                            |
| S1                 | 81,7           |                                            |
| S2                 | 95,7           |                                            |
| S3                 | 94,4           |                                            |
| S4                 | 97,8           |                                            |
| S5                 | 95,3           |                                            |
| S6                 | 91,2           |                                            |
| S7                 | 90,8           |                                            |
| S8                 | 89,4           |                                            |

**Table S2. The Fluorescence Intensity of live and dead (L, D, respectively) staphylococcal biofilms with regard to their location in T (top), M (middle) and B (bottom) parts of biofilm**

| Strain no  | Part of biofilm | Fluorescence<br>Intensity L:D | Matches pattern FI<br>M > FI T and FI B? |
|------------|-----------------|-------------------------------|------------------------------------------|
| ATCC 6538  | T               | 980: 710                      | Yes                                      |
|            | M               | 2499:1441                     |                                          |
|            | B               | 258: 742                      |                                          |
| ATCC 33591 | T               | 492: 938                      | Yes                                      |
|            | M               | 891: 689                      |                                          |
|            | B               | 161:591                       |                                          |
| S1         | T               | 664:523                       | Yes                                      |
|            | M               | 1725:1705                     |                                          |
|            | B               | 326:623                       |                                          |
| S2         | T               | 1353:779                      | Yes                                      |
|            | M               | 4130:3174                     |                                          |
|            | B               | 703:1021                      |                                          |
| S3         | T               | 954:627                       | Yes                                      |
|            | M               | 4265:3094                     |                                          |
|            | B               | 498:295                       |                                          |
| S4         | T               | 769:412                       | Yes                                      |
|            | M               | 1900:621                      |                                          |
|            | B               | 219:492                       |                                          |
| S5         | T               | 205:474                       | Yes                                      |
|            | M               | 432:381                       |                                          |
|            | B               | 176:321                       |                                          |
| S6         | T               | 522:634                       | Yes                                      |
|            | M               | 1421:839                      |                                          |
|            | B               | 283:425                       |                                          |

|    |   |         |     |
|----|---|---------|-----|
| S7 | T | 405:174 | Yes |
|    | M | 571:331 |     |
|    | B | 108:273 |     |
| S8 | T | 411:290 | Yes |
|    | M | 710:629 |     |
|    | B | 138:305 |     |

**Figure S1. Three types (A,B,C) of distribution of dead/cell wall compromised cells vs. viable/cell wall non-compromised cells in staphylococcal biofilm *in vitro*; the vertical cross-section through the biofilm structure. A – strain ATCC 6538; B – strain S1, C -ATCC 33591. Scale bar is 30  $\mu$ m. Microscope SP8, magn.40x.**

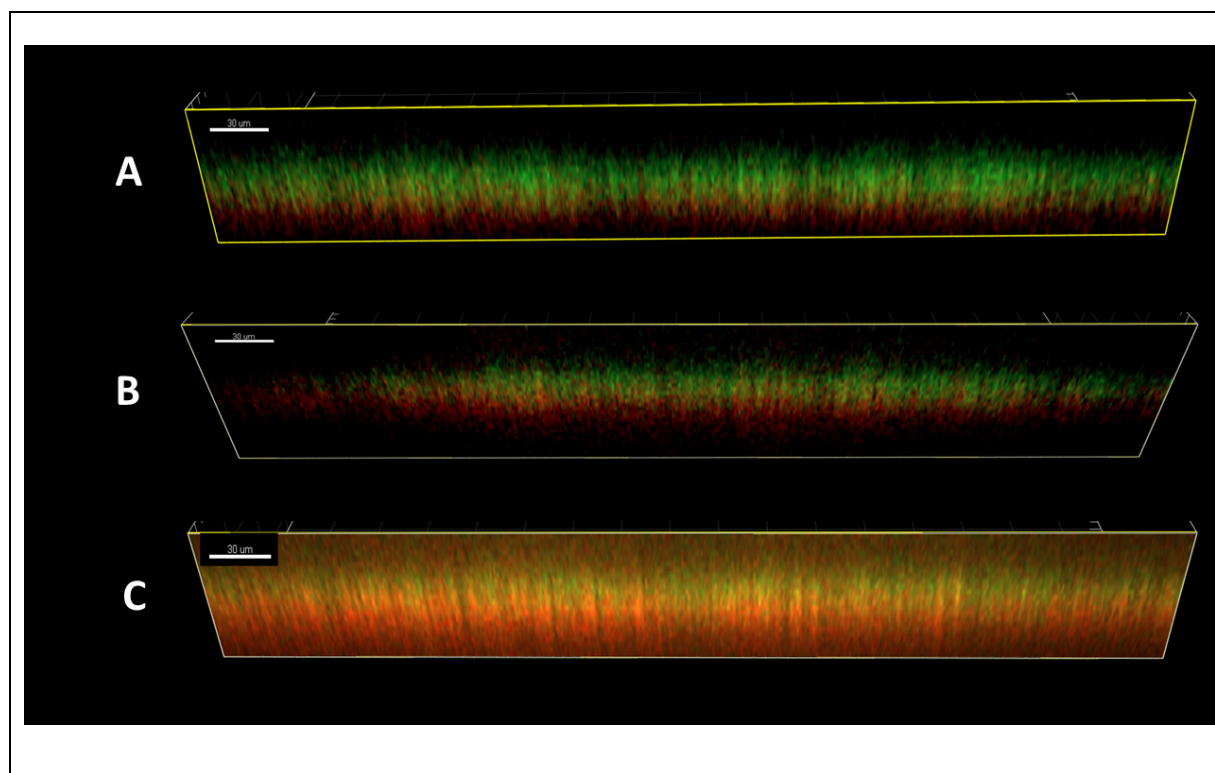

**Figure S2. The different types of Live/Dead cells' distribution in biofilm within single plate. Strain ATCC 33591. Scale bar is 40 $\mu$ m**

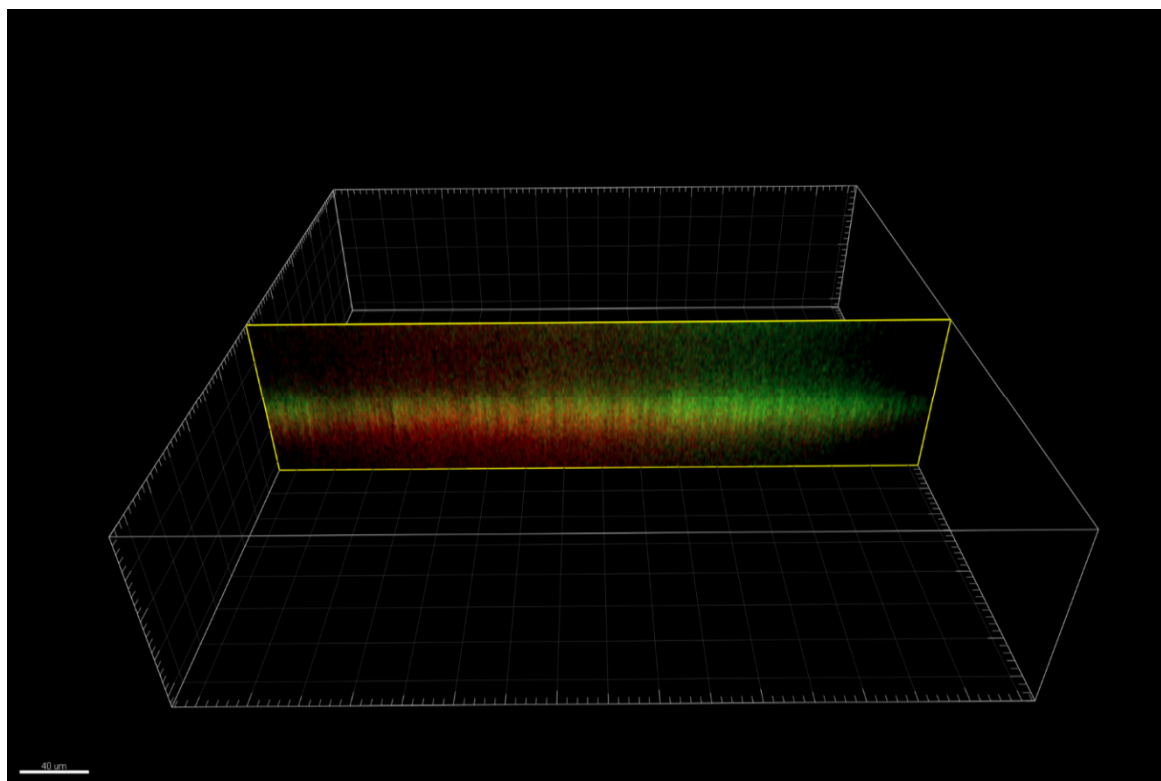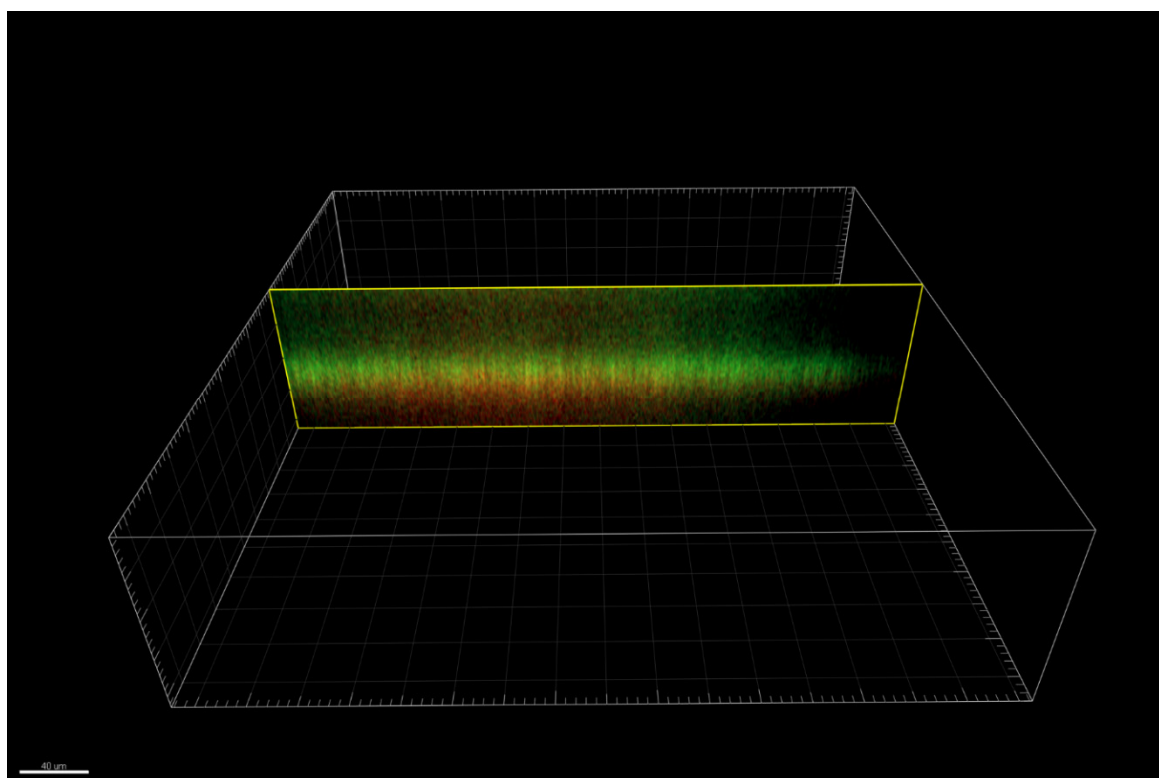

**Figure S3. The impact of operators' various pipetting habits (A,B,C) on dye distribution in the well (of a 24-well plate) covered with biofilm formed by the same staphylococcal strain (ATCC 6538). Picture D presents the biofilm of the aforementioned strain dyed with the L/D method by an operator with 3 years of experience in staphylococcal biofilm culturing and dyeing. The red cross indicates the approximate place of pipette tip placement.**

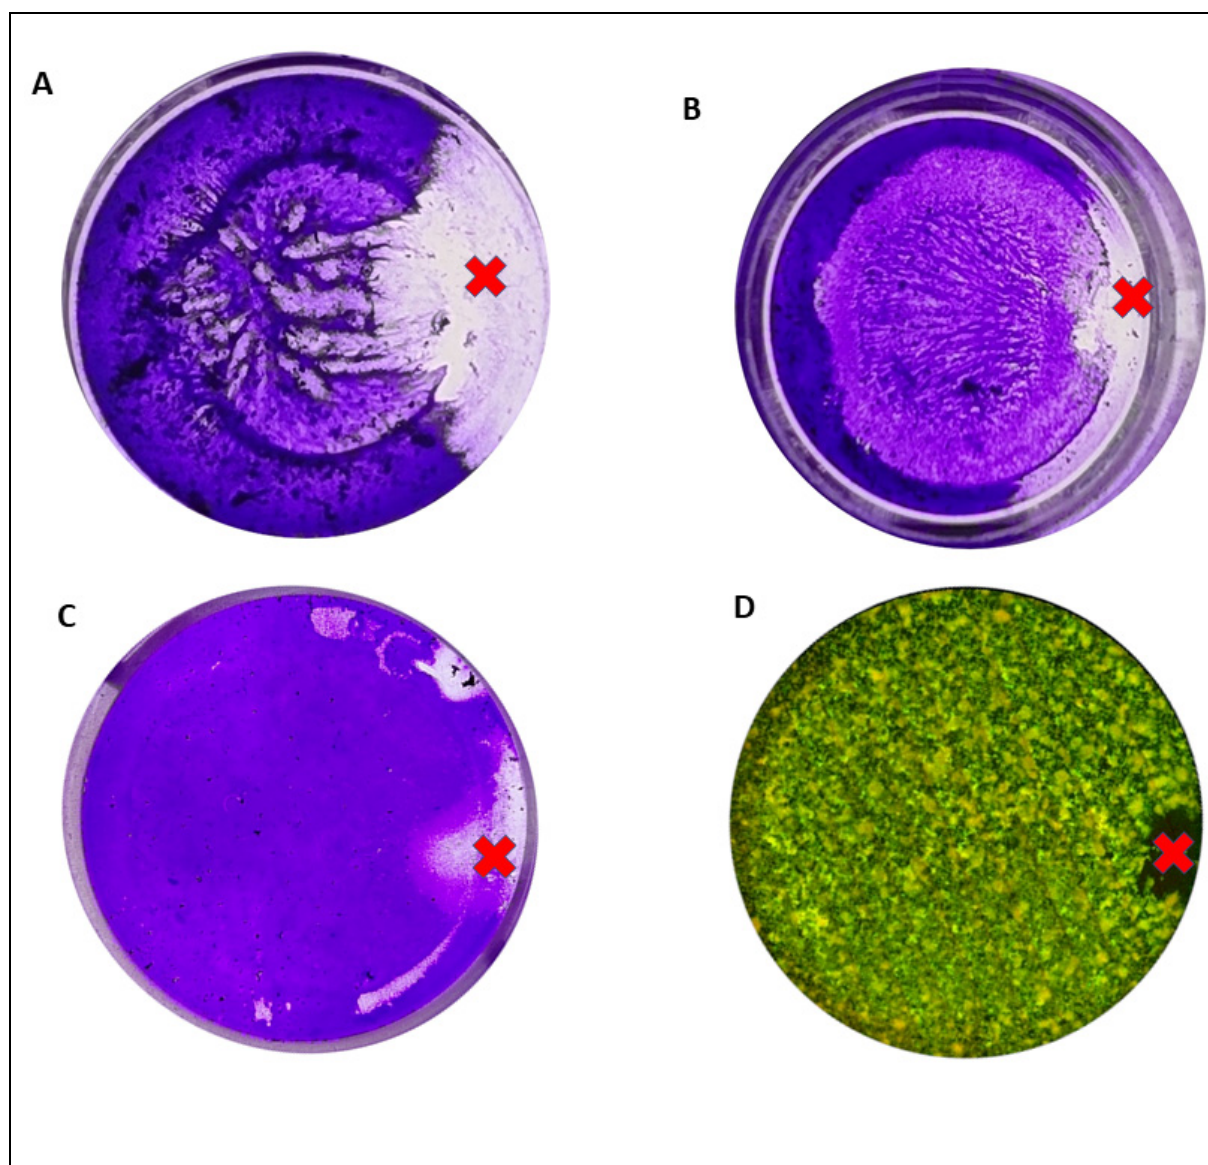

Supplement: s1 [file s1]
